# Supplementary material for: An ultrastable zinc-based organic framework as a recyclable luminescent probe for methylmalonic acid detection
Source: Royal Society of Chemistry journal article supplement (doi:10.1039/d2tc02722d), 2022-01-01
Supplement: d2tc02722d1.pdf [file d2tc02722d1.pdf]

## Electronic Supplementary Information

### Ultrastable Zinc-Based Organic Framework as a Recyclable Luminescence Probe for the Methylmalonic Acid Detection

Xudong Zhang,<sup>a</sup> Yadong Tian,<sup>a</sup> Jing Shi,<sup>a</sup> Xiaomin Kang<sup>\*a,b</sup> and Zhiliang Liu<sup>\*a</sup>

<sup>a</sup>*Inner Mongolia Key Laboratory of Chemistry and Physics of Rare Earth Materials, College of Chemistry and Chemical Engineering, Inner Mongolia University, Hohhot, 010021, PR China.*

<sup>b</sup>*Key Laboratory of Advanced Energy Materials Chemistry (Ministry of Education), College of Chemistry, Nankai University, Tianjin 300071, China.*

E-mail: [kangxm@imu.edu.cn](mailto:kangxm@imu.edu.cn), E-mail: [cezliu@imu.edu.cn](mailto:cezliu@imu.edu.cn)

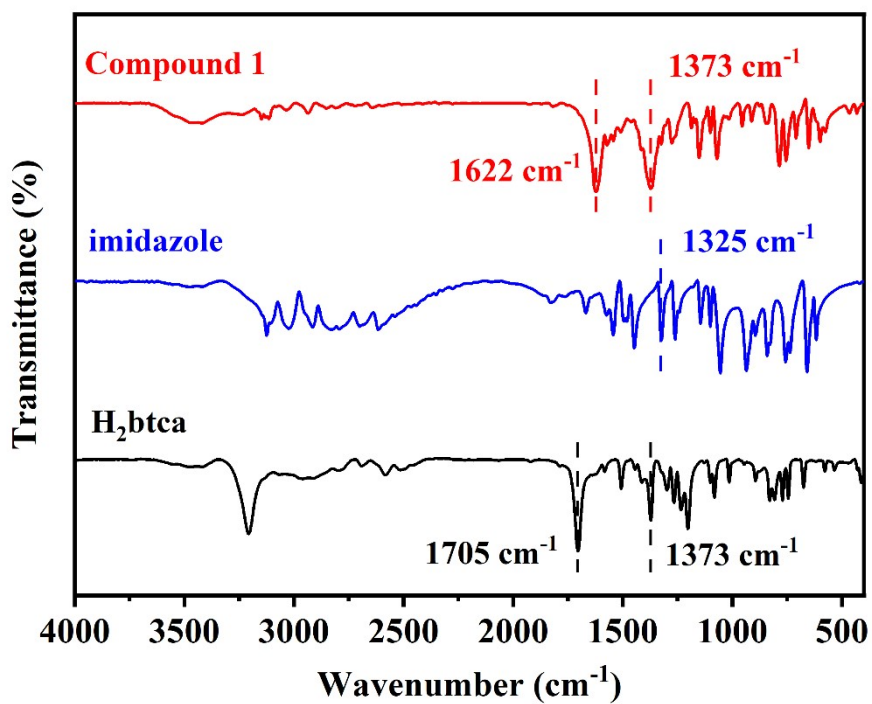

**Fig. S1** The FT-IR spectra of compound **1** and ligands. (H<sub>2</sub>btca and imidazole). Black: H<sub>2</sub>btca; Blue: imidazole; Red: compound **1**.

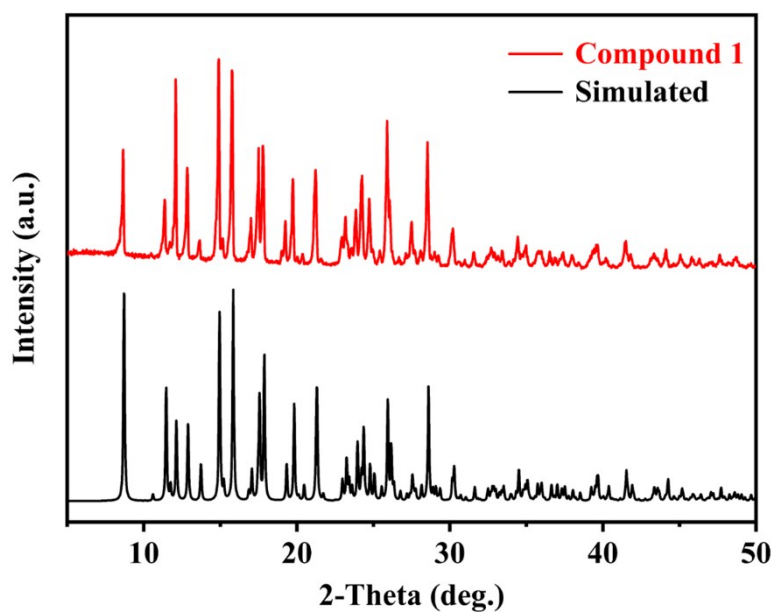

**Fig. S2** The PXRD patterns of compound **1** and the simulated ones from Mercury.

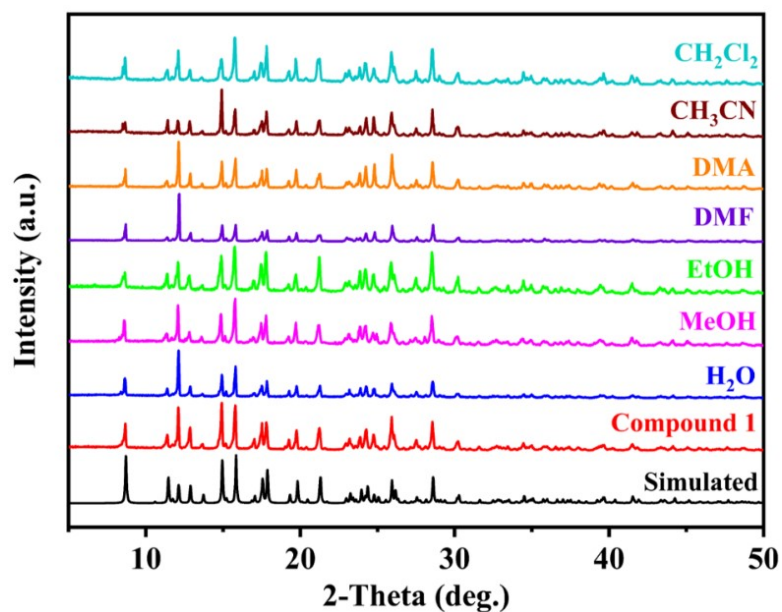

**Fig. S3** The PXRD patterns for compound **1** immersing in common solvents (H<sub>2</sub>O, N, N'-dimethylformamide (DMF), N, N'-dimethylacetamide (DMA), methanol, ethanol, acetonitrile and dichloromethane) for 12 h.

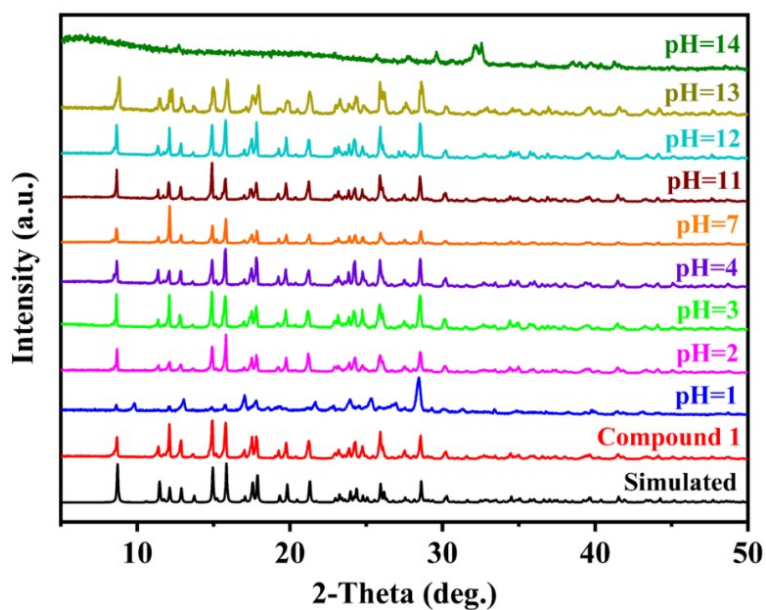

**Fig. S4** The PXRD patterns for compound **1** in various acid/base solutions with pH range from 1.0 to 14.0 for 12 h.

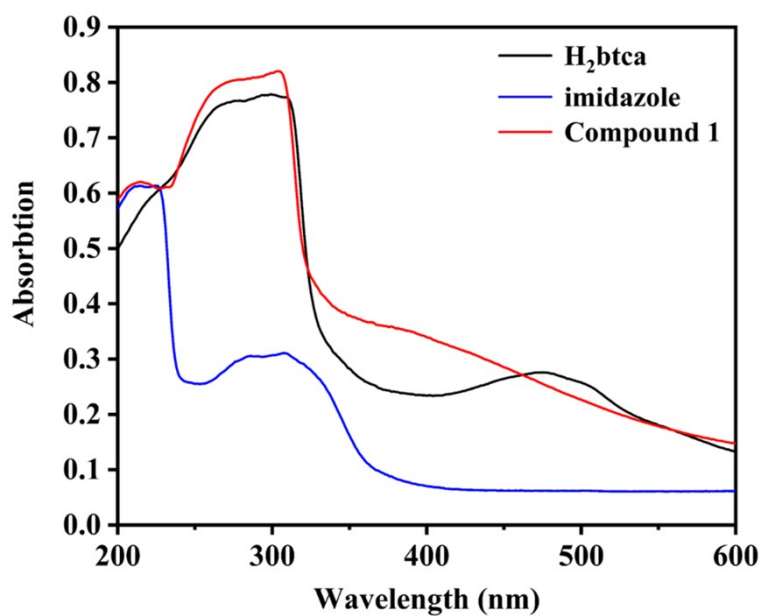

**Fig. S5** The solid-state UV spectra for compound **1** and ligands (H<sub>2</sub>btca and imidazole). Black: H<sub>2</sub>btca; Blue: imidazole; Red: compound **1**.

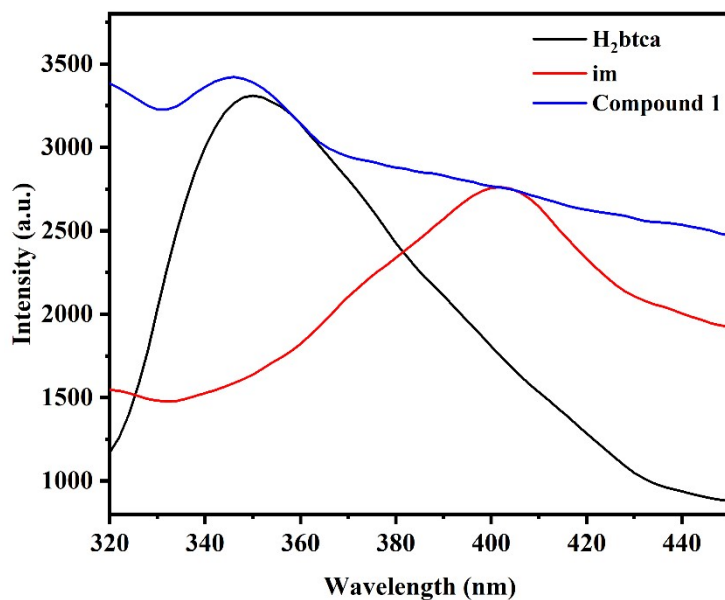

**Fig. S6** The solid-state photoluminescence spectrum for compound **1** and ligands ( $\lambda_{\text{ex}} = 290$  nm). Black: H<sub>2</sub>btca; Red: imidazole; Blue: compound **1**.

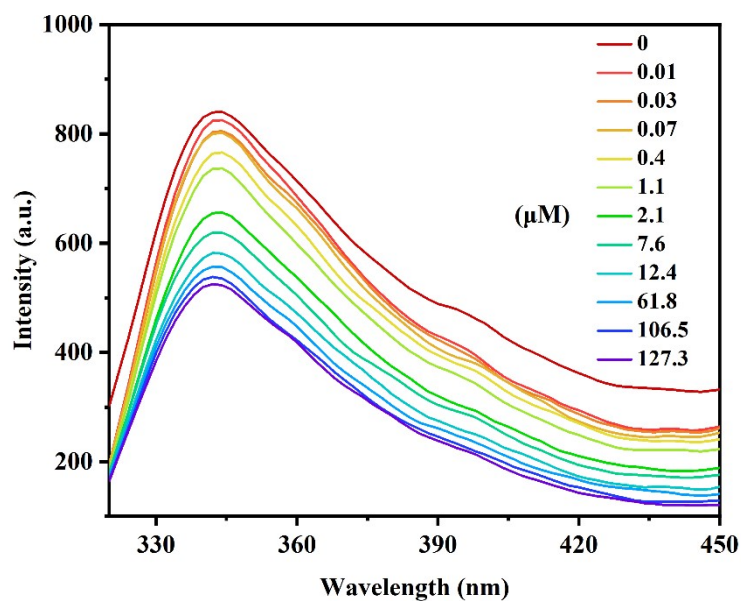

**Fig. S7** Fluorescence emission spectra of H<sub>2</sub>btca after adding different concentrations of MMA solutions. ( $\lambda_{\text{ex}} = 280 \text{ nm}$ ).

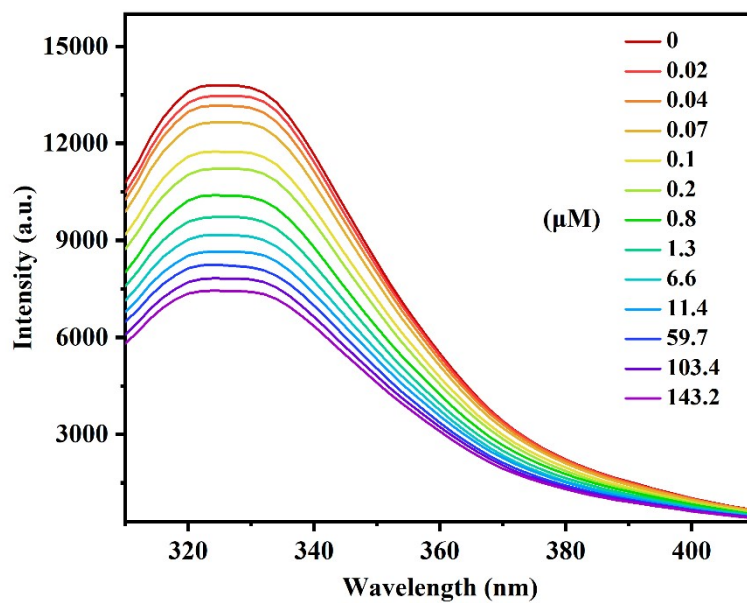

**Fig. S8** Fluorescence emission spectra of imidazole after adding different concentrations of MMA solutions. ( $\lambda_{\text{ex}} = 280 \text{ nm}$ ).

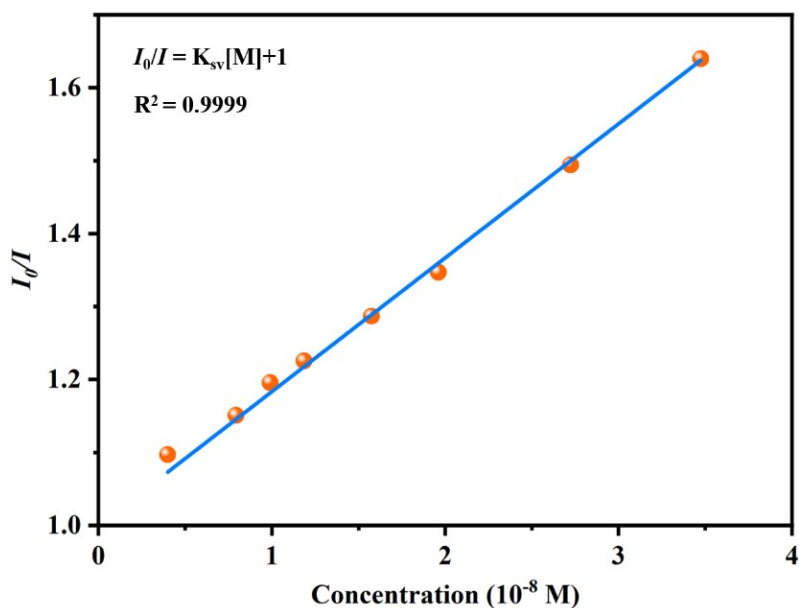

**Fig. S9** The luminescence intensity vs. methylmalonic acid (MMA) concentration plots ( $I_0$  and  $I$  represent the luminescence intensity of compound **1** in aqueous solution before and after adding different concentration of methylmalonic acid, respectively;  $K_{sv}$  is the Stern Volmer constant).

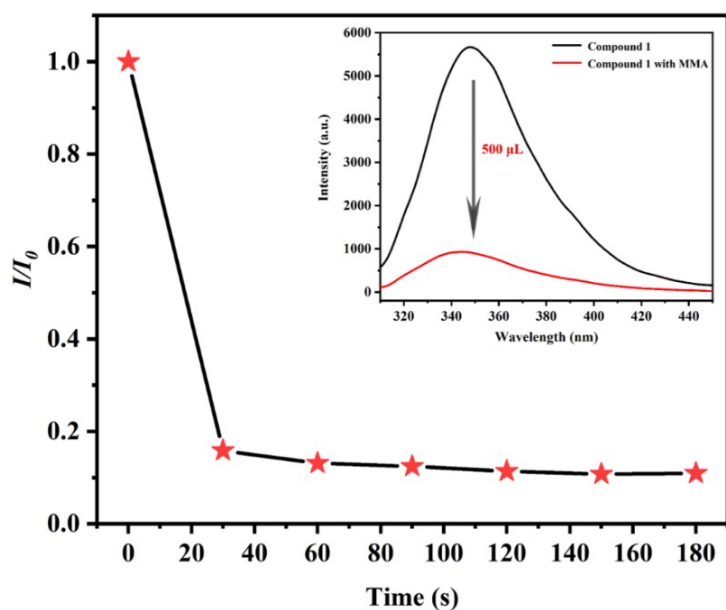

**Fig. S10** Quenching efficiency versus response time after adding 1 mg/mL MMA solution to compound **1** ( $\lambda_{ex} = 291$  nm;  $\lambda_{em} = 352$  nm. Inset: fluorescence emission spectra of **1** after adding 1 mg/mL MMA).

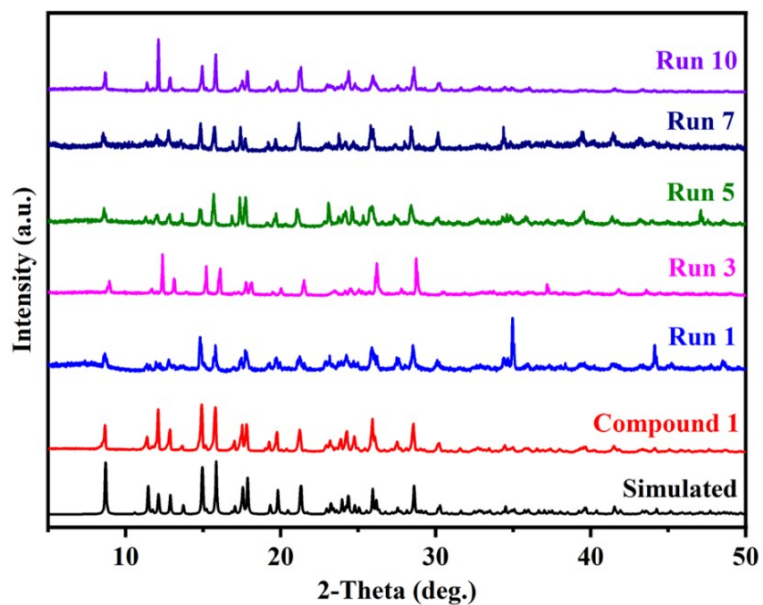

**Fig. S11** The PXRD patterns of compound **1** after the recognition cycles for MMA.

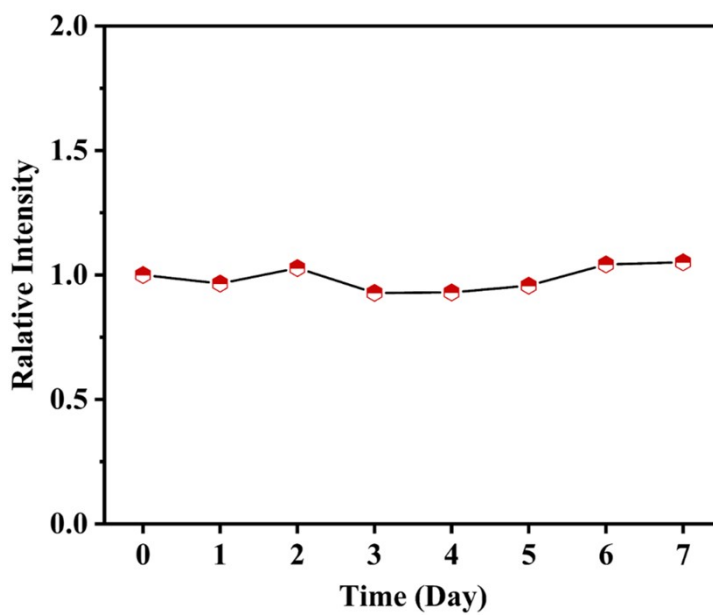

**Fig. S12** The fluorescence emission spectra of compound **1** immersed in water for 7 days ( $\lambda_{\text{ex}} = 291 \text{ nm}$ ;  $\lambda_{\text{em}} = 352 \text{ nm}$ ).

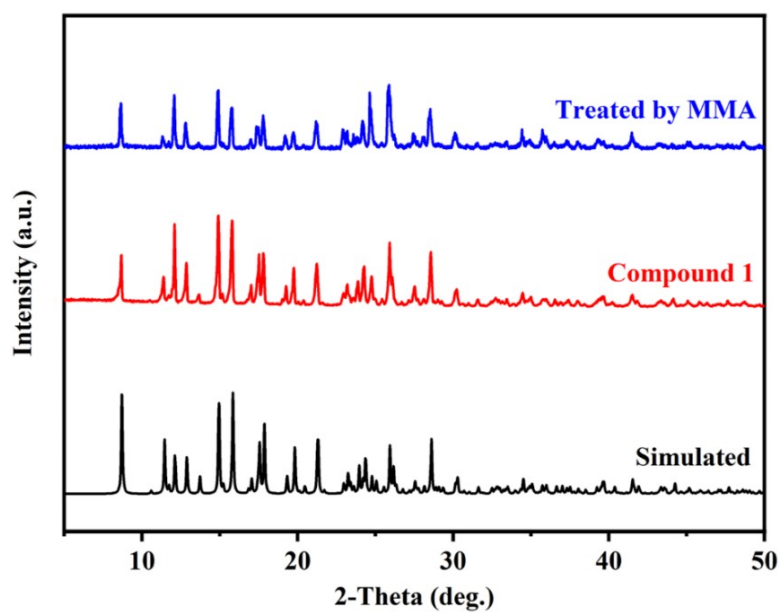

**Fig. S13** The PXRD patterns of compound **1** after treated by MMA.

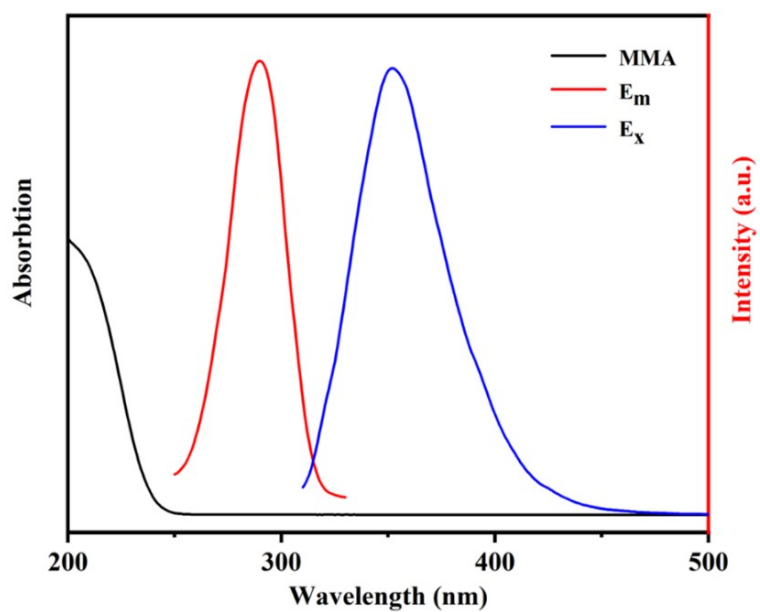

**Fig. S14** The comparison of liquid-state UV spectra of MMA (black) and the excitation spectrum (red) and emission spectra (blue) of compound **1**.



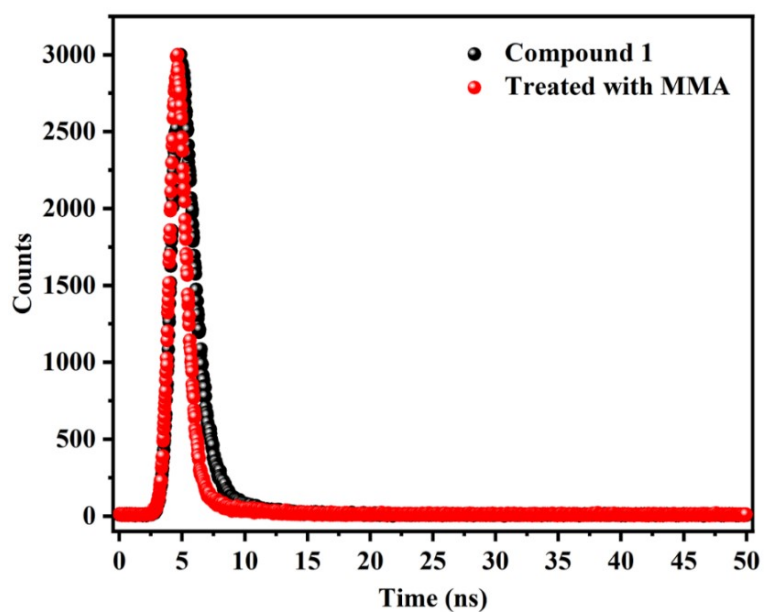

**Fig. S15** The time resolved luminescence decay tests of compound **1** (black) and after treated by MMA (red).

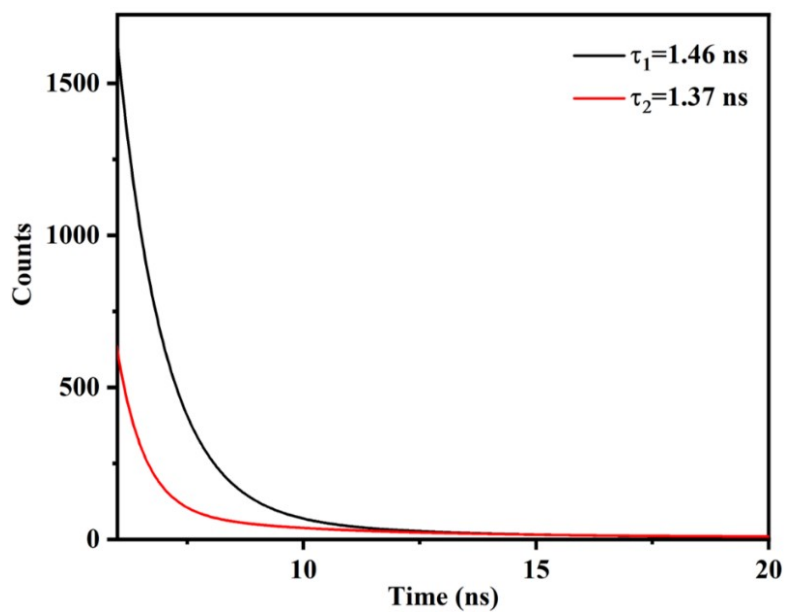

**Fig. S16** The time resolved luminescence decay corresponding fitted lines of compound **1** (black) and after treated by MMA (red).

**Table S1** Crystal data and structure refinement for compound **1** before and after water treatment for 120 days.

|                                                     | <b>Compound 1</b>                                                              | <b>After 120 days water treatment (1-H<sub>2</sub>O)</b>                       |
|-----------------------------------------------------|--------------------------------------------------------------------------------|--------------------------------------------------------------------------------|
| Empirical formula                                   | C <sub>24</sub> H <sub>23</sub> N <sub>11</sub> O <sub>5</sub> Zn <sub>2</sub> | C <sub>24</sub> H <sub>23</sub> N <sub>11</sub> O <sub>5</sub> Zn <sub>2</sub> |
| Formula weight                                      | 676.27                                                                         | 676.27                                                                         |
| Crystal system                                      | orthorhombic                                                                   | orthorhombic                                                                   |
| Space group                                         | <i>Pna2</i> <sub>1</sub>                                                       | <i>Pna2</i> <sub>1</sub>                                                       |
| <i>a</i> (Å)                                        | 16.6901(11)                                                                    | 16.5206(2)                                                                     |
| <i>b</i> (Å)                                        | 8.1097(13)                                                                     | 8.12460(10)                                                                    |
| <i>c</i> (Å)                                        | 20.2890(12)                                                                    | 20.2605(3)                                                                     |
| $\beta$ (°)                                         | 90.00                                                                          | 90.00                                                                          |
| Volume(Å <sup>3</sup> )                             | 2746.2(5)                                                                      | 2719.43(6)                                                                     |
| <i>Z</i>                                            | 4                                                                              | 4                                                                              |
| $\rho_{calc}$ (g/m <sup>3</sup> )                   | 1.636                                                                          | 1.652                                                                          |
| $\mu$ (mm <sup>-1</sup> )                           | 1.804                                                                          | 2.673                                                                          |
| <i>R</i> <sub>int</sub>                             | 0.0869                                                                         | 0.0405                                                                         |
| Goodness-of-fit on <i>F</i> <sup>2</sup>            | 0.954                                                                          | 1.038                                                                          |
| Final <i>R</i> indexes [ <i>I</i> ≥ 2σ( <i>I</i> )] | <i>R</i> <sub>1</sub> = 0.0741, w <i>R</i> <sub>2</sub> = 0.0987               | <i>R</i> <sub>1</sub> = 0.0419, w <i>R</i> <sub>2</sub> = 0.1094               |
| Final <i>R</i> indexes [all data]                   | <i>R</i> <sub>1</sub> = 0.1486, w <i>R</i> <sub>2</sub> = 0.1185               | <i>R</i> <sub>1</sub> = 0.0458, w <i>R</i> <sub>2</sub> = 0.1123               |

**Table S2** Reported chemo-sensors and traditional detection methods for MMA and their detection limits.

| Material                                          | Method                           | LOD                  | Reference        |
|---------------------------------------------------|----------------------------------|----------------------|------------------|
| Ru/Tb@In-MOF                                      | Ratiometric fluorescence sensing | 3.8 $\mu\text{g/mL}$ | 1                |
| LC-MS                                             | \                                | 2.75 $\mu\text{M}$   | 2                |
| GC-FID                                            | \                                | 2.4 $\mu\text{M}$    | 3                |
| Anthracene-based fluorescence colorimetric sensor | naked eye colorimetric           | 1 $\mu\text{M}$      | 4                |
| GO/AuNP-g-ATMS-co-AEMA/AA                         | Electrochemical sensing          | 0.21 $\mu\text{M}$   | 5                |
| Amino acid-functionalized carbon nanodots         | Fluorescent sensor array         | 0.1 $\mu\text{M}$    | 6                |
| GC-MS                                             | \                                | 0.025 $\mu\text{M}$  | 7                |
| <b>Compound 1</b>                                 | <b>fluorescence sensing</b>      | <b>1.7 nM</b>        | <b>This work</b> |
| PdAu-PPy/CFP                                      | Electrochemical sensing          | 1.32 pM              | 8                |
| HPLC                                              | \                                | 0.33 pM              | 9                |

**Table S3** The ICP test for compound **1** after MMA recognition.

| Filter liquor                       | The leakage of Zn <sup>2+</sup> |
|-------------------------------------|---------------------------------|
| After five recycles for sensing MMA | 0.097%                          |

**Table S4** HOMO and LUMO energies calculated for the ligands and MMA used at B3LYP/6-31G level.

| \                   | HOMO (eV) | LUMO (eV) | Band Gap (eV) |
|---------------------|-----------|-----------|---------------|
| im                  | -6.140    | 0.869     | 7.009         |
| H <sub>2</sub> btca | -6.924    | -1.976    | 4.948         |
| MMA                 | -7.491    | -0.247    | 7.244         |

**Table S5** Recovery test of MMA spiked in urine samples.

| Spiked (nM) | Detected (nM) | Recovery (%) | RSD (% , n = 5) |
|-------------|---------------|--------------|-----------------|
| 50          | 49.18         | 98.4         | 3.0             |
| 100         | 101.32        | 101.3        | 4.5             |
| 200         | 198.02        | 99.0         | 2.7             |

## References

- 1 Y. Zhang, X. Qu and B. Yan, *J. Mater. Chem. C*, 2021, **9**, 3440-3446.
- 2 A. C. Yap, U. A. Mahamad, S. Y. Lim, H. J. Kim and Y. M. Choo, *Sensors*, 2014, **14**, 21140-21150.
- 3 M. Aghamohammadi, P. Shahdousti and B. Harooni, *Microchem. J.*, 2016, **124**, 188-194.
- 4 H. Miyaji, J. Fujimoto, R. Mabuchi, M. Okumura, S. Goto and Y. Honda, *Tetrahedron Lett.*, 2017, **58**, 3623-3627.
- 5 J. R. Deepa, T. S. Anirudhan, G. Soman and V. C. Sekhar, *Microchem. J.*, 2020, **159**, 105489.
- 6 N. Du, M. L. Chen, Y. M. Cui, X. Liu and Y. Li, *Sens. Actuators B Chem.*, 2022, **350**, 130825.
- 7 M. M. Kushnir and G. Komaromy-Hiller, *J. Chromatogr. B*, 2000, **741**, 231-241.
- 8 K. B. Akshaya, V. Anitha, M. Nidhin, Y. N. Sudhakar and G. Louis, *Talanta*, 2020, **217**, 121028.
- 9 O. Y. Al-Dirbashi, M. Jacob, Z. Al-Hassnan, R. W. Chabayta, F. El-Badaoui and M. S. Rashed, *Biomed. Chromatogr.*, 2006, **20**, 54-60.
